# Supplementary material
Source: publisher figshare collection journal article supplement (https://tandf.figshare.com/ndownloader/files/21665943)
Supplement: Supplementary file 1 [file 21665943]

Factor Loadings for Items and Reliabilities for Measures

| Factor Loadings for Items and Reliabilities for the Measures used in Study 1 | |
| --- | --- |
| *Perceived Positive Face Threat α = .69* | |
| I felt my self-image was preserved.—I felt my self-image was threatened. | .82 |
| I did NOT feel self-conscious.—I felt self-conscious. | .56 |
| I did NOT feel embarrassed.—I felt embarrassed. | .56 |
| *Perceived Negative Face Threat α = .92* |  |
| I did NOT feel bothered.—I felt bothered. | .93 |
| I did NOT feel imposed upon.—I felt imposed upon. | .90 |
| I did NOT feel disturbed.—I felt disturbed. | .87 |
| I did NOT feel inconvenienced.—I felt inconvenienced. | .77 |
| I did NOT feel intruded upon.—I felt intruded upon. | - |
| I did NOT feel like I owed her/him something in return.—I felt like I owed her/him something in return. | - |
| *Evaluation of Advice Usefulness α = .95* |  |
| NOT Helpful—Helpful | .92 |
| NOT Valuable—Valuable | .92 |
| NOT Beneficial—Beneficial | .91 |
| Useless—Useful | .90 |
| NOT Constructive—Constructive | .81 |
| NOT knowledgeable—Knowledgeable | .75 |

*Note.* Dashes indicate not calculated because the items were dropped.

| Factor Loadings for Items and Reliabilities for the Measures used in Study 2 | |
| --- | --- |
| *Positive Face Threat α = .80* | |
| The housemate undervalued what I did. | .80 |
| The housemate disapproved what I did. | .76 |
| The housemate blatantly expressed rejection. | .71 |
| The housemate made me look bad in front of him/her.  The housemate showed disrespect towards me. | .62  - |
| *Negative Face Threat α = .79* |  |
| The housemate imposed on me. | .85 |
| The housemate intruded upon me. | .76 |
| The housemate attempted to alter my action. | .66 |
| The housemate threatened my freedom to choose what I want to do.  The housemate took away some of my independence. | .53  - |
| *Evaluation of Advice Usefulness α = .90* |  |
| Valuable | .89 |
| Useful | .86 |
| Helpful | .85 |
| Beneficial | .83 |
| Constructive | .65 |
| Knowledgeable | .61 |

*Note.* Dashes indicate not calculated because the items were dropped.

| Negative Emotions Measures used in Study 2 | |
| --- | --- |
| *Upsetting Emotions α = .93* | |
| Upset | .87 |
| Frustrated | .83 |
| Hurt | .83 |
| Unhappy | .83 |
| Angry | .79 |
| Resentful | .77 |
| Uncomfortable | .77 |
| Defensive | .69 |
| *Shameful Emotions α = .89* |  |
| Ashamed | .86 |
| Humiliated | .86 |
| Bad | .83 |
| Rejected | .78 |
|  |  |
| *Items not used* |  |
| Anxious, Obligated, Regret, Indebted, Contempt, Embarrassed | - |

*Note.* Dashes indicate not calculated because the items were dropped.

Hypothetical Scenario and Manipulations

You realized that you need a part-time job to support your living expenses next semester.  During the break, you searched for a part-time job.  While googling, you discovered a student job center that provides information on jobs available on campus.  You visited the center in person, acquired some information, compared several options on campus, and finally decided to work at a dining hall starting from the first week of the semester.  You chose this hall specifically because it is very close to the building where you have most of your classes.  The pay is enough to cover your living expenses.  **[Though you are very satisfied with the convenient location of this hall, you still wonder what job opportunities would be available off-campus just because you feel that you did not spend much time searching for off-campus job opportunities. = 1; You are very satisfied with your decision to work at this hall because of the convenient location. = 0 for receptiveness]**

It is a week before the semester starts, and a new housemate of yours comes up to you.  You two introduce yourselves and catch up in small talk about part-time jobs. **[You tell your housemate that you would be working at one of the dining halls on campus once the semester starts, and ask if s/he could give any advice about it. =1; You tell your housemate that you would be working at one of the dining halls on campus once the semester starts. = 0 for solicitation]** Then the housemate says: “Jeez, working at a dining hall is really not a good idea.  If you’re going to do the same work, it’s better to do it at a restaurant in downtown. They pay you a lot more, and you get good food from time to time.  I think you should really look for one downtown. It’s still not too late. I know this café, Badger’s cafe.  They pay well. They sometimes need you to work during midterms or finals, but it pays off!  I know you can cancel the employment contract with school since the semester hasn’t started yet. Call the Human Resource department right now. You deserve more for your time.”
